# Supplementary material for: A Self‐Healing Flexible Quasi‐Solid Zinc‐Ion Battery Using All‐In‐One Electrodes
Source: PubMed Central journal article supplement (PMC8061350; doi:10.1002/advs.202004689), 2021-02-14
Supplement: ADVS-8-2004689-s002.pdf [file ADVS-8-2004689-s002.pdf]

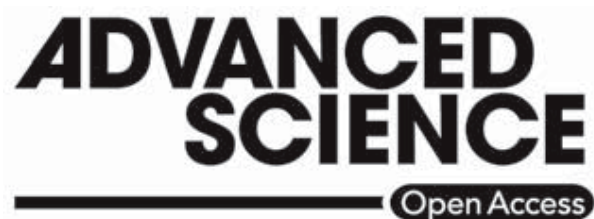

## Supporting Information

for *Adv. Sci.*, DOI: 10.1002/advs.202004689

### **A Self-Healing Flexible Quasi-Solid Zinc-Ion Battery Using All-in-One Electrodes**

*Jinyun Liu,\* Jiawei Long, Zihan Shen, Xing Jin, Tianli Han, Ting Si, Huigang Zhang\**

## Supporting Information

### A Self-Healing Flexible Quasi-Solid Zinc-Ion Battery Using All-in-One Electrodes

Jinyun Liu,<sup>\*</sup> Jiawei Long, Zihan Shen, Xing Jin, Tianli Han, Ting Si, Huigang Zhang<sup>\*</sup>

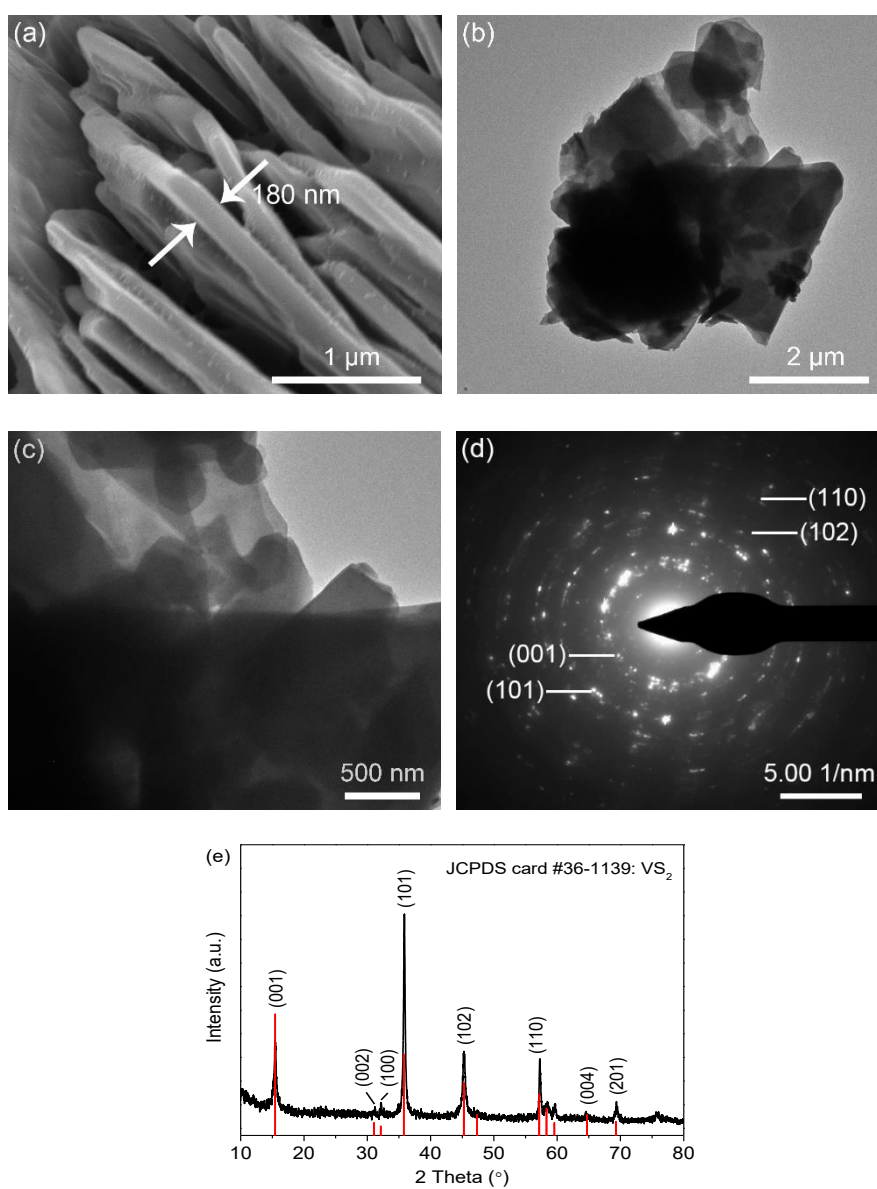

**Fig. S1** (a) SEM, (b) high- and (c) low-magnification TEM images of VS<sub>2</sub> nanosheets. (d) The SAED pattern of the VS<sub>2</sub> nanosheet. (e) XRD pattern of the VS<sub>2</sub>/CC cathode.

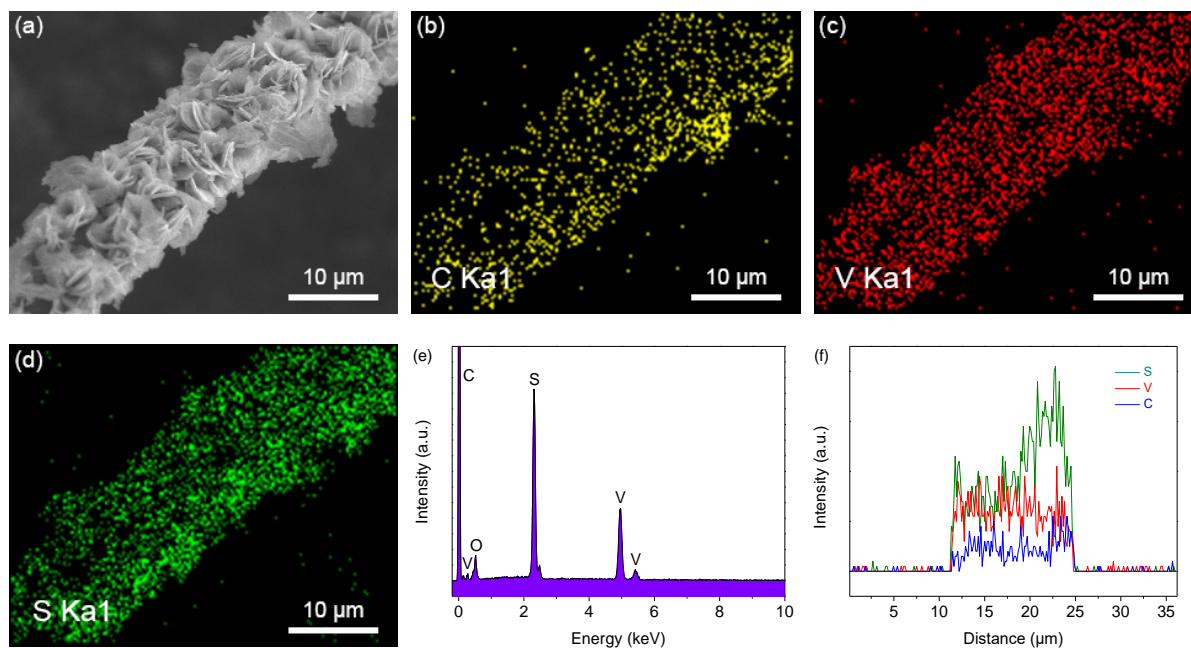

**Fig. S2** (a) SEM image of  $\text{VS}_2/\text{CC}$  and corresponding mapping images of (b) C, (c) V and (d) S. (e) EDX spectrum and (f) Line-scan profiles of  $\text{VS}_2/\text{CC}$ .

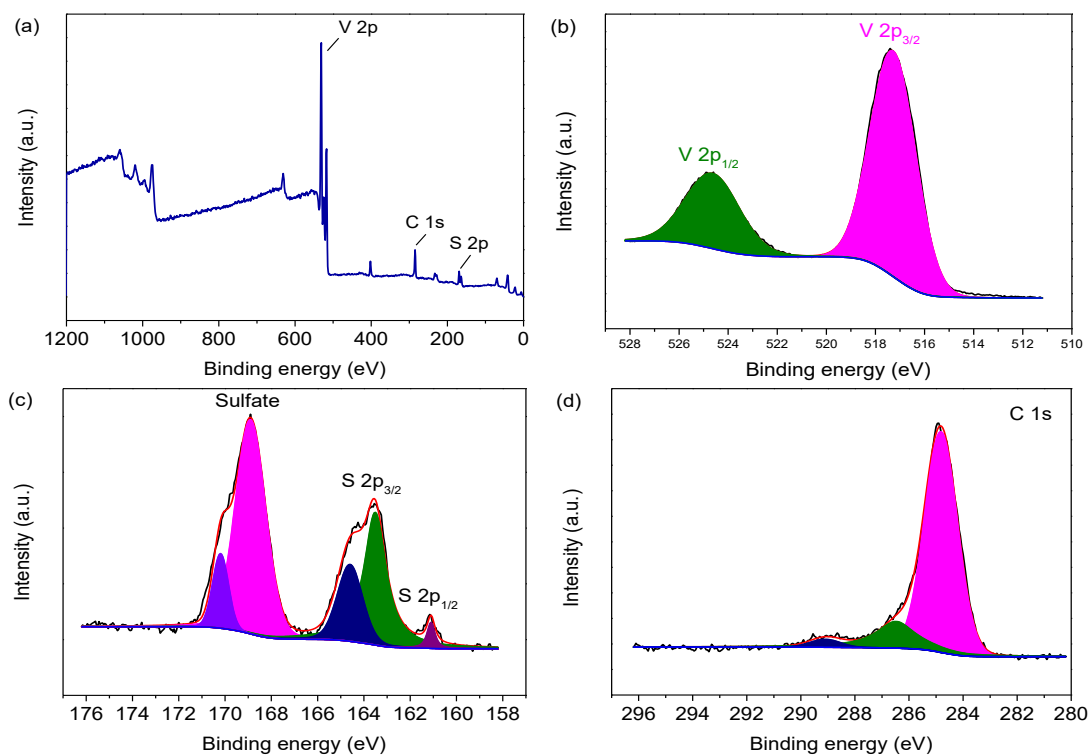

**Fig. S3** (a) XPS survey spectrum of  $\text{VS}_2/\text{CC}$ . High-resolution XPS spectra of (b) V 2p, (c) S 2p, and (d) C 1s.

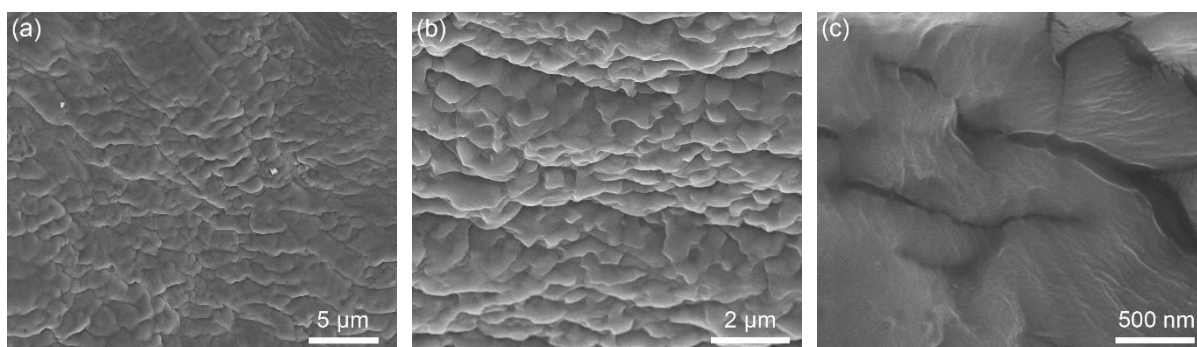

**Fig. S4** SEM images of pure PVA hydrogel at different magnifications.

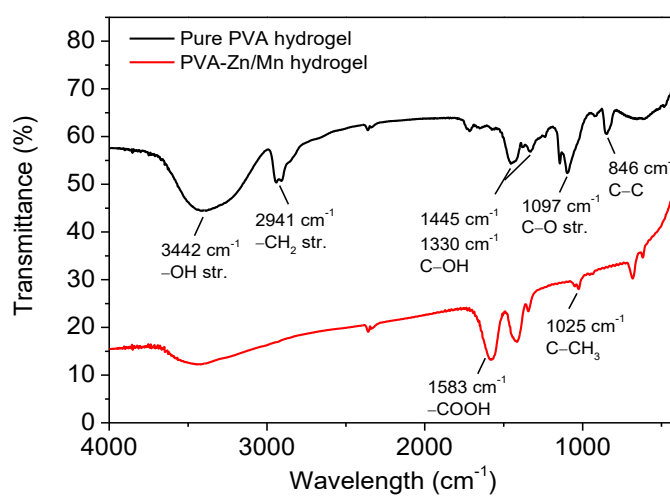

**Fig. S5** FT-IR spectra of the PVA-Zn/Mn and pure PVA hydrogels.

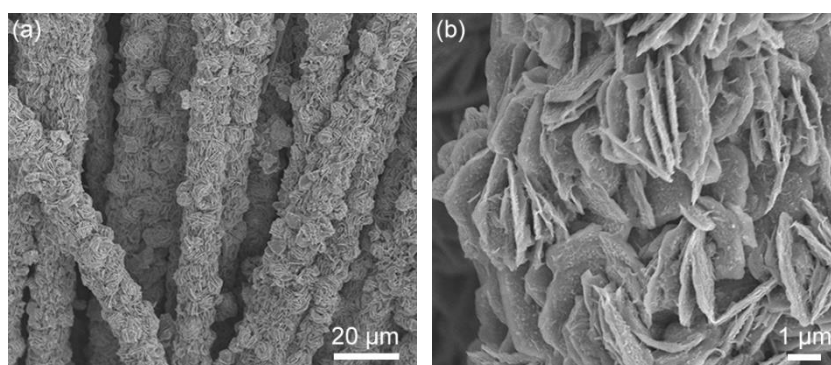

**Fig. S6** (a) Low- and (b) high-magnification SEM images of the VS<sub>2</sub>/CC cathode after cycling 40 times.

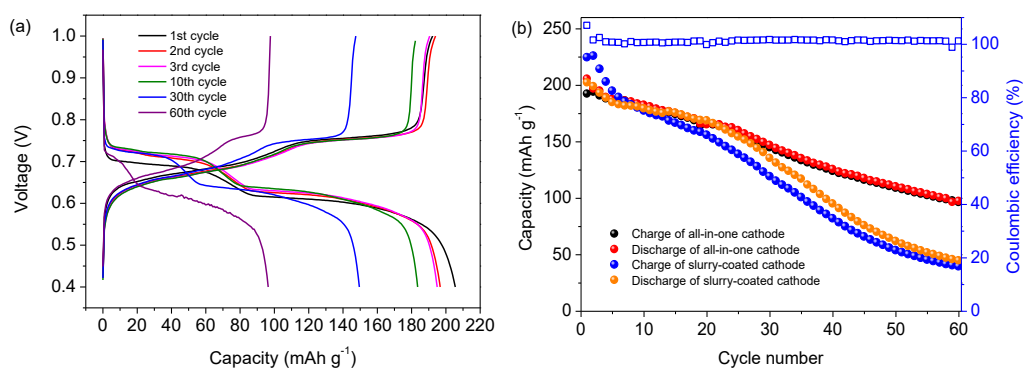

**Fig. S7** (a) Charge-discharge curves of the Zn-ion battery. (b) Cycling performances of the batteries at 50 mA g<sup>-1</sup> based on the all-in-one VS<sub>2</sub>/CC and slurry-coated cathodes. The slurry-coated cathode was prepared by milling VS<sub>2</sub> nanosheets, carbon black, polyvinylidene fluoride (PVDF), at the mass ratio of 7:2:1, and then stirred for 4 h. The slurry was casted on carbon paper with the thickness of 100 μm and dried at 60 °C under vacuum. The electrode was cut to discs with the diameter of 12 mm. At last, the battery was assembled by following the procedure the same as the batteries using all-in-one electrodes.

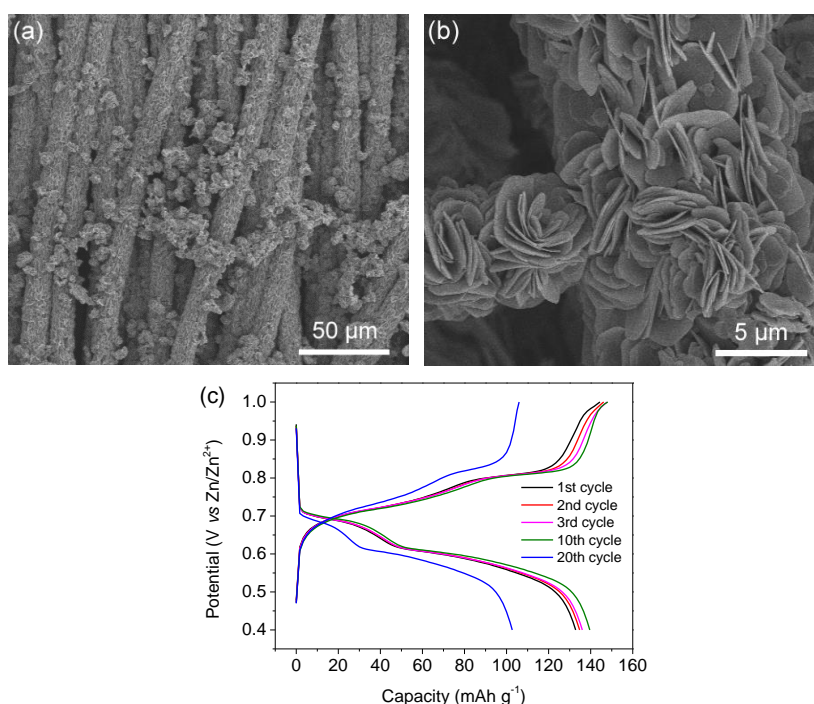

**Fig. S8** (a) Low- and (b) high-magnification SEM images of the VS<sub>2</sub>/CC cathode with a VS<sub>2</sub> loading of 25.3 mg cm<sup>-2</sup>. The sample was prepared by using relative high concentrations of NH<sub>4</sub>VO<sub>3</sub> and thioacetamide, while the other experimental procedures were the same. (c) Corresponding charge-discharge curves at 50 mA g<sup>-1</sup>.

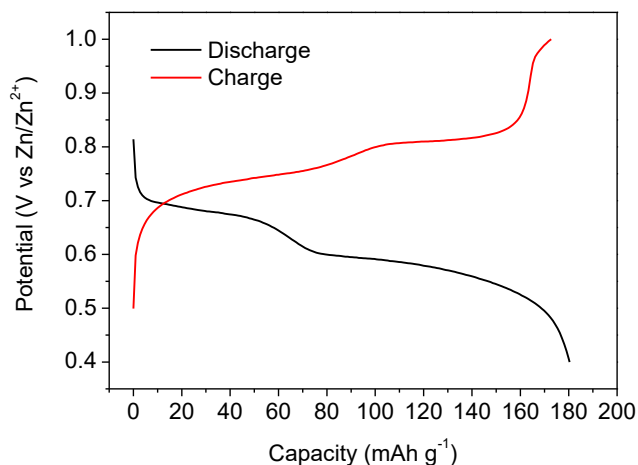

**Fig. S9** Charge and discharge curves of the VS<sub>2</sub>/CC cathode at 50 mAh g<sup>-1</sup>. The Zn<sup>2+</sup> intercalation number ( $x+y$ ) was calculated according to the discharge curve at 50 mAh g<sup>-1</sup> and based on the following equation:<sup>[1]</sup>

$$x + y = \frac{nC_a M}{C_0}$$

where  $n$  refers to the number of electron exchange,  $C_a=180.3$  mAh g<sup>-1</sup>,  $M(\text{VS}_2)=115$  g mol<sup>-1</sup>,  $C_0=26.8$  nm M<sup>-1</sup>,  $F=N_A \times e=96500$  C mol<sup>-1</sup>, 1 Ah=3600 C).

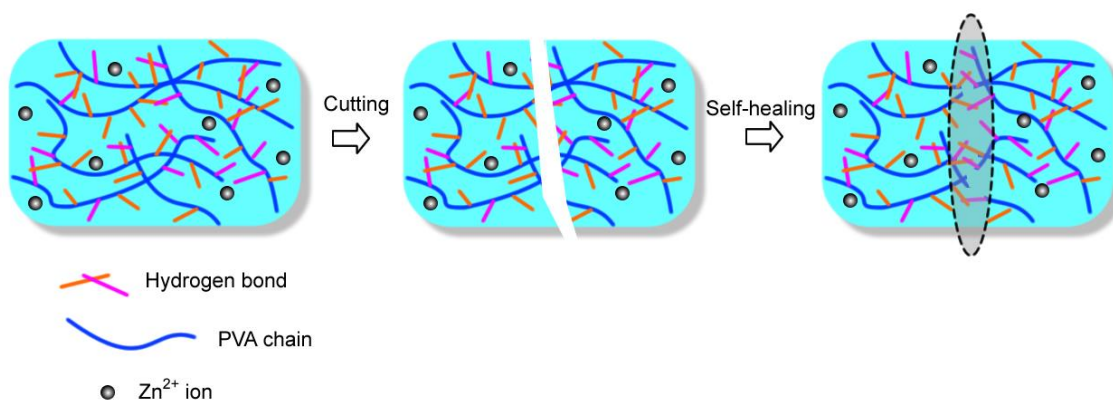

**Fig. S10** Illustration for the cutting/self-healing process of the hydrogel electrolyte.

**Table S1.** Charge transfer resistance of VS<sub>2</sub>/CC cathode within one charge-discharge cycle.

| Battery potential (V) | Charge transfer resistance ( $\Omega$ ) |
|-----------------------|-----------------------------------------|
| Fresh cell 0.9 V      | 23.1                                    |
| Discharging to 0.8 V  | 24.6                                    |
| Discharging to 0.7 V  | 43.3                                    |
| Discharging to 0.6 V  | 171.4                                   |
| Discharging to 0.5 V  | 170.2                                   |
| Discharging to 0.4 V  | 117.0                                   |
| Charging to 0.5 V     | 173.4                                   |
| Charging to 0.6 V     | 201.7                                   |
| Charging to 0.7 V     | 195.0                                   |
| Charging to 0.8 V     | 51.2                                    |
| Charging to 0.9 V     | 34.7                                    |
| Charging to 1.0 V     | 31.2                                    |

**Table S2.** Comparison on the electrochemical performance of some cathode of Zn-ion batteries.

| Cathode                                                                       | Electrolyte                                           | Separator           | Anode     | Capacity /mAh g <sup>-1</sup> | Rates /A g <sup>-1</sup> | Cycle numbers | Ref. |
|-------------------------------------------------------------------------------|-------------------------------------------------------|---------------------|-----------|-------------------------------|--------------------------|---------------|------|
| ZnMn <sub>2</sub> O <sub>4</sub>                                              | 2.0 M ZnSO <sub>4</sub> + 0.1 M MnSO <sub>4</sub>     | Glass fiber         | Zn foil   | 67                            | 0.1                      | 40            | [2]  |
| ZnMnCoO <sub>4</sub>                                                          | 2.0 M ZnSO <sub>4</sub> + 0.1 M MnSO <sub>4</sub>     | Polymeric separator | Zn foil   | 39                            | 0.2                      | 120           | [3]  |
| Na <sub>3</sub> V <sub>2</sub> (PO <sub>4</sub> ) <sub>2</sub> F <sub>3</sub> | 2 M Zn(CF <sub>3</sub> SO <sub>3</sub> ) <sub>2</sub> | Glass fiber         | Zn foil   | 63.8                          | 0.2                      | 600           | [4]  |
| MoO <sub>2</sub> /Mo <sub>2</sub> N                                           | 2 M Zn(CF <sub>3</sub> SO <sub>3</sub> ) <sub>2</sub> | Glass fiber         | Zn foil   | 135                           | 0.1                      | 100           | [5]  |
| Layered MnO <sub>2</sub>                                                      | 1 M ZnSO <sub>4</sub>                                 | Glass fiber         | Zn foil   | 97                            | 0.1                      | 50            | [6]  |
| Prussian blue                                                                 | Ionic liquid choline acetate-water + zinc acetate     | Glass fiber         | Zn powder | 54                            | 0.1                      | 50            | [7]  |

|                                                       |                                                                                       |                   |                     |      |     |     |              |
|-------------------------------------------------------|---------------------------------------------------------------------------------------|-------------------|---------------------|------|-----|-----|--------------|
| Mn (BTC)                                              | 2.0 M ZnSO <sub>4</sub> +<br>0.1 M MnSO <sub>4</sub>                                  | Air-laid<br>paper | ZIF-8@Zn            | 28   | 0.1 | 50  | [8]          |
| 2, 3-<br>diaminophe<br>nazine                         | 2.0 M ZnSO <sub>4</sub>                                                               | Glass fiber       | Zn foil             | 28   | 0.1 | 200 | [9]          |
| Perylene-<br>3,4,9,10-<br>tetracarboxy<br>lic diimide | 3.0 M ZnSO <sub>4</sub>                                                               | Glass fiber       | Zn foil             | 73   | 0.1 | 200 | [10]         |
| $\beta$ -MnO <sub>2</sub> @C                          | 3 M<br>Zn(CF <sub>3</sub> SO <sub>3</sub> ) <sub>2</sub> +<br>0.1 M MnSO <sub>4</sub> | Glass fiber       | Zn foil             | 150  | 0.2 | 250 | [11]         |
| Mn <sub>2</sub> O <sub>3</sub>                        | 3.0 M ZnSO <sub>4</sub> +<br>0.1 M MnSO <sub>4</sub>                                  | Glass fiber       | Zn foil             | 30   | 0.2 | 200 | [12]         |
| MnO <sub>2</sub>                                      | 1 M ZnSO <sub>4</sub> +<br>0.05 M H <sub>2</sub> SO <sub>4</sub>                      | Glass fiber       | Zn foil             | 89.5 | 0.3 | 55  | [13]         |
| All-in-one<br>VS <sub>2</sub> /CC                     | Self-healing<br>PVA-Zn/Mn<br>hydrogel                                                 | -                 | All-in-one<br>Zn/CC | 123  | 0.2 | 40  | This<br>work |

## References

- [1] a) P. He, M. Yan, G. Zhang, R. Sun, L. Chen, Q. An, L. Mai, *Adv. Energy Mater.* **2017**, 7, 1601920; b) T. Jiao, Q. Yang, S. Wu, Z. Wang, D. Chen, D. Shen, B. Liu, J. Cheng, H. Li, L. Ma, C. Zhi, W. Zhang, *J. Mater. Chem. A* **2019**, 7, 16330-16338.
- [2] J. W. Lee, S. D. Seo, D. W. Kim, *J. Alloy. Compd.* **2019**, 800, 478-482.
- [3] A. Baby, B. Senthilkumar, P. Barpanda, *ACS Appl. Energy Mater.* **2019**, 2, 3211-3219.
- [4] W. Li, K. Wang, S. Cheng, K. Jiang, *Energy Storage Mater.* **2018**, 15, 14-21.
- [5] W. Xu, K. Zhao, Y. Wang, *Energy Storage Mater.* **2018**, 15, 374-379.
- [6] M. H. Alfaruqi, S. Islam, D. Y. Putro, V. Mathew, S. Kim, J. Jo, S. Kim, Y.-K. Sun, K. Kim, J. Kim, *Electrochim. Acta* **2018**, 276, 1-11.
- [7] Z. Liu, P. Bertram, F. Endres, *J. Solid State Electr.* **2017**, 21, 2021-2027.



- [8] X. Pu, B. Jiang, X. Wang, W. Liu, L. Dong, F. Kang, C. Xu, *Nano-Micro Lett.* **2020**, *12*, 152.
- [9] Q. Wang, Y. Liu, P. Chen, *J. Power Sources* **2020**, *468*, 228401.
- [10] N. Liu, X. Wu, Y. Zhang, Y. Yin, C. Sun, Y. Mao, L. Fan, N. Zhang, *Adv. Sci.* **2020**, *7*, 2000146.
- [11] W. Jiang, X. Xu, Y. Liu, L. Tan, F. Zhou, Z. Xu, R. Hu, *J. Alloy. Compd.* **2020**, *827*, 154273.
- [12] N. Liu, X. Wu, Y. Yin, A. Chen, C. Zhao, Z. Guo, L. Fan, N. Zhang, *ACS Appl. Mater. Inter.* **2020**, *12*, 28199-28205.
- [13] C. Wu, H. Tan, W. Huang, W. Li, K. N. Dinh, C. Yan, W. Wei, L. Chen, Q. Yan, *Adv. Funct. Mater.* **2020**, *30*, 2003187.
